# Supplementary material
Source: PubMed Central journal article supplement (PMC4570219)
Supplement: np5b00268_si_001.pdf [file np5b00268_si_001.pdf]

## Dereplicating and Spatial Mapping of Secondary Metabolites from Fungal Cultures *in Situ*

Vincent P. Sica, Huzefa A. Raja, Tamam El-Elimat, Vilmos Kertesz, Gary J. Van Berkel, Cedric J. Pearce, and Nicholas H. Oberlies

**Figure S1.** (A) The guttate (red circle) and mycelium (blue circle) of fungal code G100, *Clohesyomyces aquaticus*, were sampled using the droplet-LMJ-SSP. A clearer picture of the guttates from a different culture of G100 is shown on the right. (B) The base peak chromatogram displayed phomopsinone A in the guttate (red). (C) The same peak was not apparent in the mycelium (blue). The XIC for phomopsinone A ( $m/z$  225.11 at 4.43 min) was over two orders of magnitude higher in counts per second (cps) for (D) the guttate ( $4.8 \times 10^5$  cps) over (E) the mycelium ( $1.4 \times 10^3$  cps).

**Figure S2.** Comparison of the MS/MS fragmentation for (A) compound **5** with (B) its standard and (C) compound **6** with its (D) standard.

**Figure S3.** The extracted ion chromatogram (XIC) of  $m/z$  (A)  $381.1099 \pm 5$  ppm and (B)  $399.1204 \pm 5$  ppm. (C) At 3.47 min, the accuracy for  $[M + H]^+$  between the observed and calculated was 0.3 ppm (399.1204 observed vs. 399.1205 calculated for  $[C_{19}H_{24}O_7Cl + H]^+$  with multiple indicators suggesting for the parent ion. The HCD fragmentation (NCE =23) of molecular ions with  $m/z$  (D) 381.11 and (E) 399.12 detected at 3.47 min. (F) Proposed structure based off of assumed biosynthetic route.

**Figure S4.** (A) Contaminated fungal culture coded MSX19583 with the “green” fungus indicated by the green circles and the “purple” fungus indicated by the purple circles. (B) Isolated fungal cultures of MSX19583 (green), *Aspergillus sydowii*, (C) and the contaminant (purple), *Chaetomium* sp.

**Figure S5.** (A) Structure of a diketopiperazine dimer (**9**) detected on the green fungal culture coded MSX19583 (Figure S4A). (B) A comparison of the extracted ion chromatograms (XIC) from the fungal culture (top) and the standard (bottom) for the accurate mass of compound **9**. (C) A comparison of the HRMS and the MS/MS for the fungal culture and the standard for compound **9**.

**Figure S6.** (A) Structure of cyclo-(L-phenylalaninyl-L-tryptophanyl) (**10**) detected on the green fungal culture coded MSX19583 (Figure S4A). (B) A comparison of the extracted ion chromatograms (XIC) from the fungal culture (top) and the standard (bottom) for the accurate mass of compound **10**. (C) A comparison of the HRMS and the MS/MS for the fungal culture and the standard for compound **10**.

**Figure S7.** (A) Image of pure culture MSX19583 with yellow crosshairs indicating sampled areas. (B) Heat map of compound **9** as sampling from the contaminant to the culture. (C) Heat map of compound **8** as sampling from the contaminant to the culture. (D) The color scale and diameter of spot indicate the relative amount of signal detected for the given analytes.

**Figure S8.** 3D model created using SketchUp Make of the custom tray designed to hold a Petri dish and a solvent vial (A). Photograph of the printed tray using the F306 3D printer (B).

**Table S1.** Fungal metabolites that were detected by the droplet-LMJ-SSP, recording the retention time (Rt), UV data, HRMS, and MS/MS.

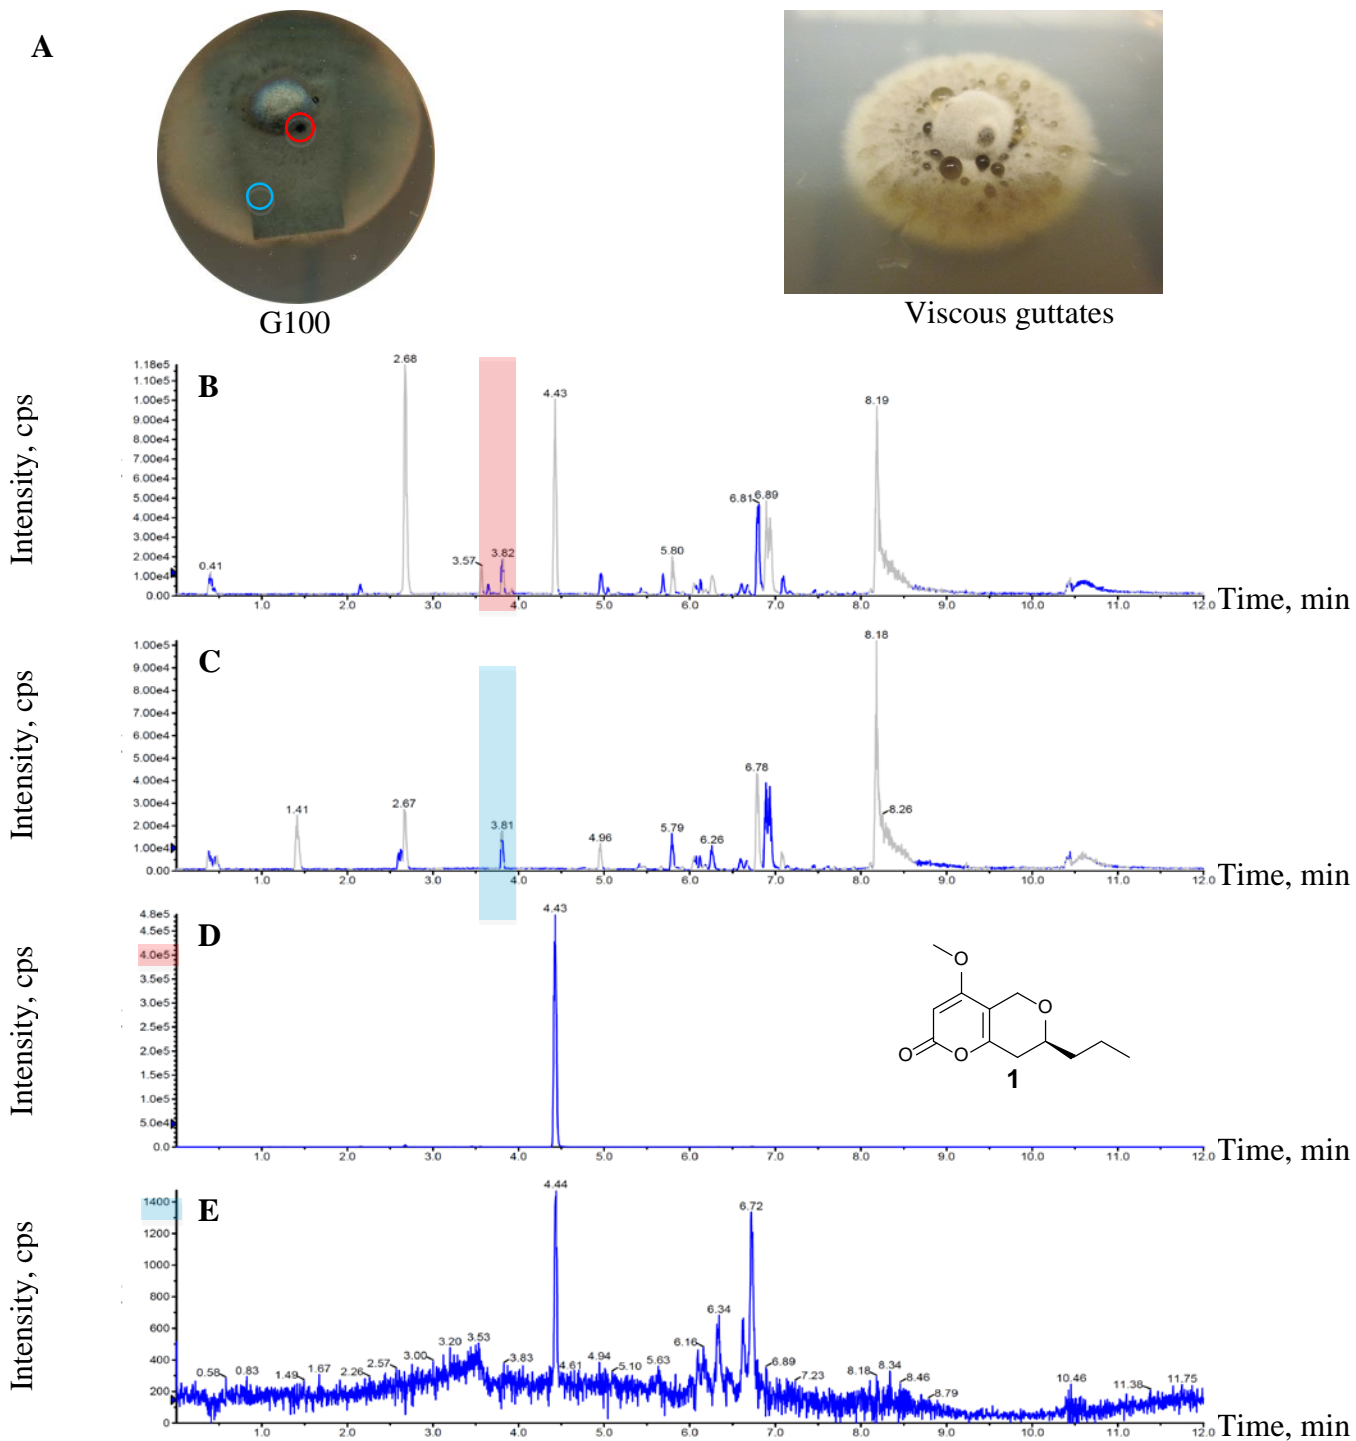

**Figure S1.** (A) The guttate (red circle) and mycelium (blue circle) of fungal code G100, *Clohesyomyces aquaticus*, were sampled using the droplet-LMJ-SSP. A clearer picture of the guttates from a different culture of G100 is shown on the right. (B) The base peak chromatogram displayed phomopsinone A in the guttate (red). (C) The same peak was not apparent in the mycelium (blue). The XIC for phomopsinone A ( $m/z$  225.11 at 4.43 min) was over two orders of magnitude higher in counts per second (cps) for (D) the guttate ( $4.8 \times 10^5$  cps) over (E) the mycelium ( $1.4 \times 10^3$  cps).

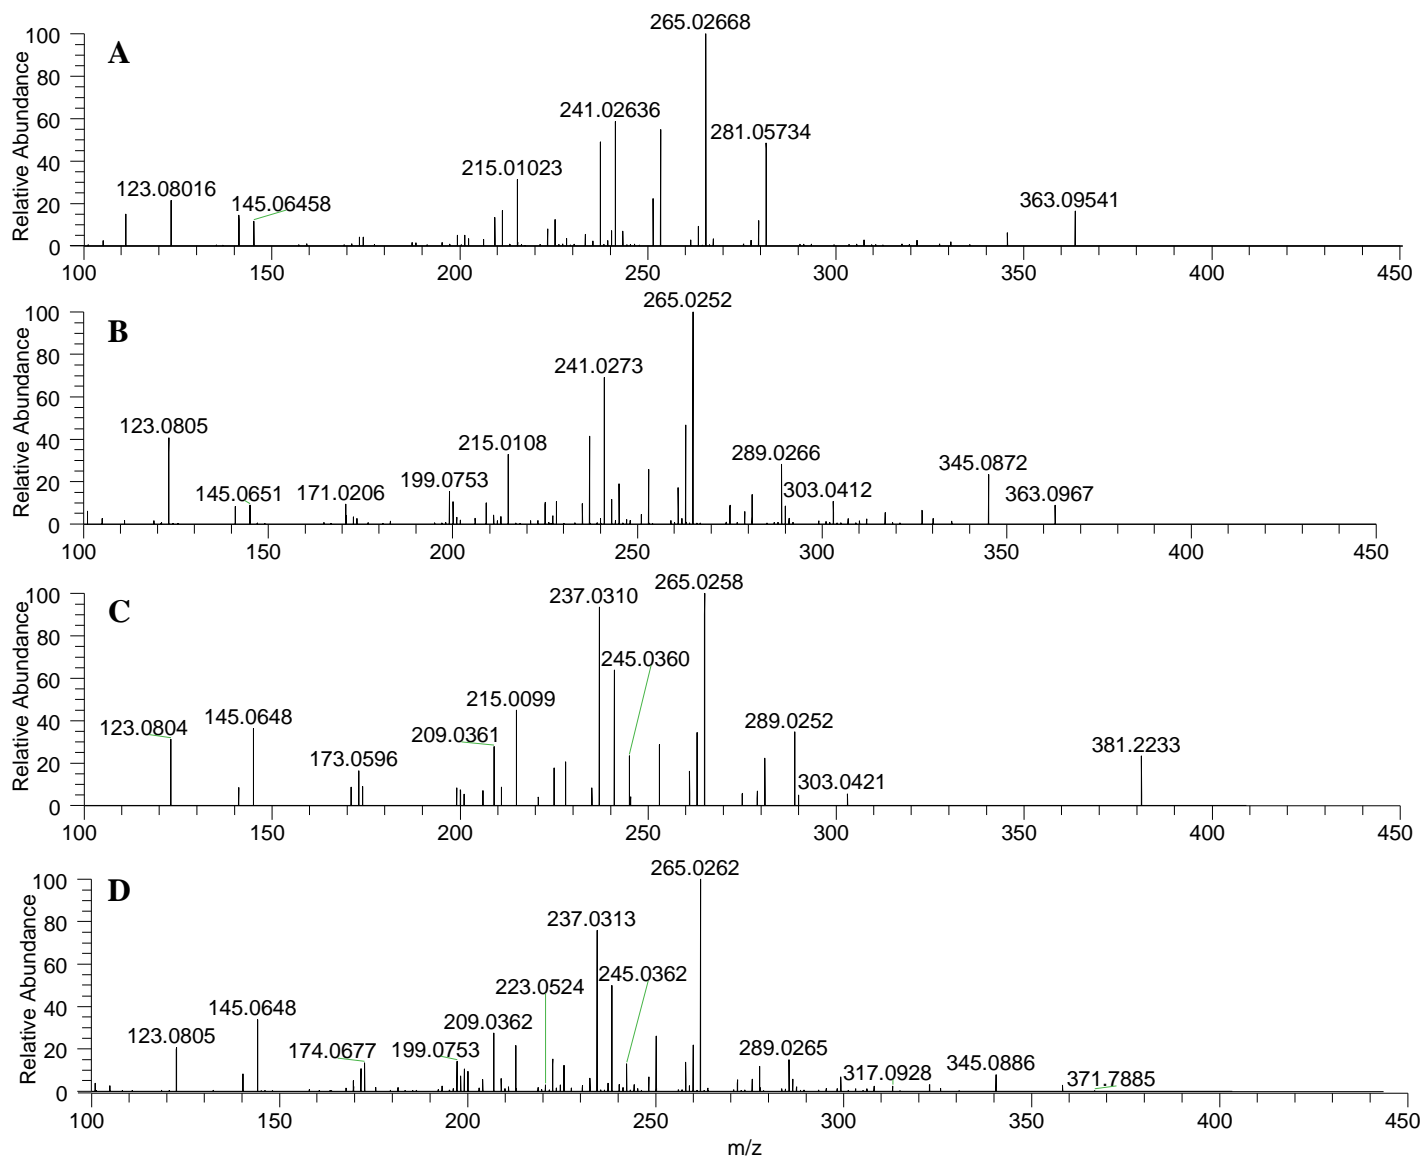

**Figure S2.** Comparison of the MS/MS fragmentation for (A) compound **5** with (B) its standard and (C) compound **6** with its (D) standard.

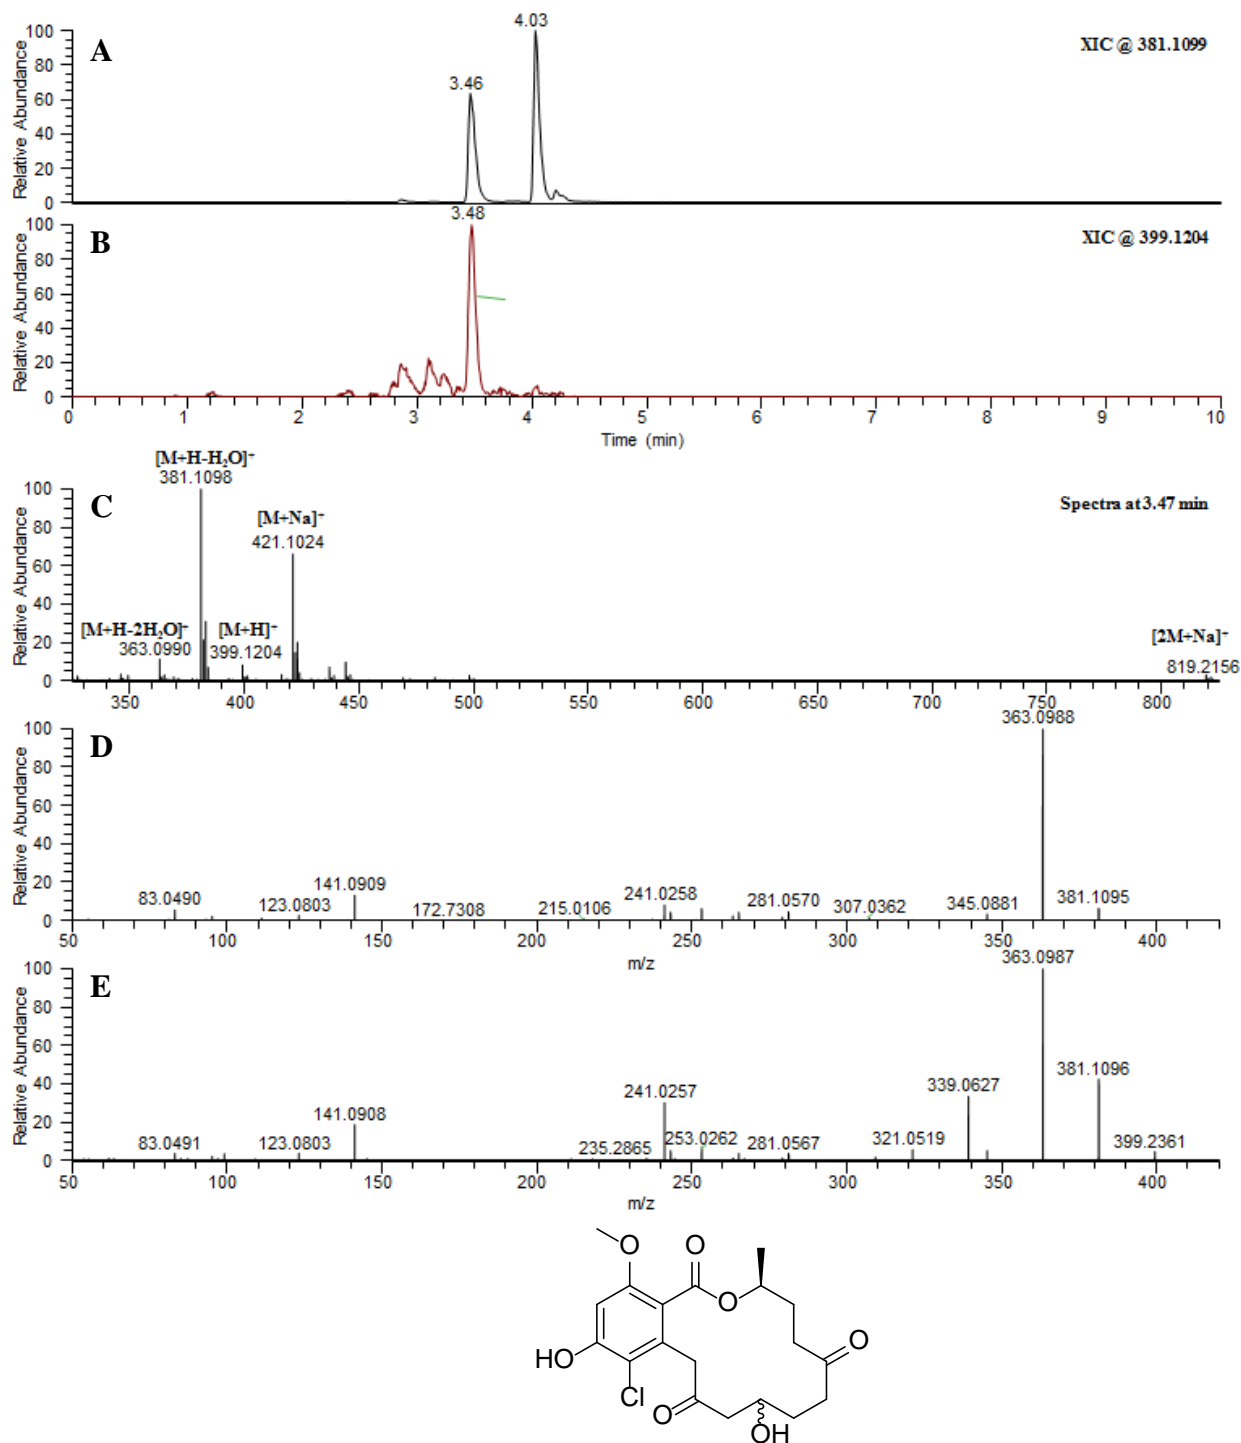

**Figure S3.** The extracted ion chromatogram (XIC) of  $m/z$  (A)  $381.1099 \pm 5$  ppm and (B)  $399.1204 \pm 5$  ppm. (C) At 3.47 min, the accuracy for  $[M + H]^+$  between the observed and calculated was 0.3 ppm (399.1204 observed vs. 399.1205 calculated for  $[C_{19}H_{24}O_7Cl + H]^+$  with multiple indicators suggesting for the parent ion. The HCD fragmentation (NCE =23) of molecular ions with  $m/z$  (D) 381.11 and (E) 399.12 detected at 3.47 min. (F) The proposed structure based off of the presumed biosynthetic route, where the hydroxy group was placed at position 8 due to similar oxygenation patterns observed with related analogues.<sup>31</sup>

**A**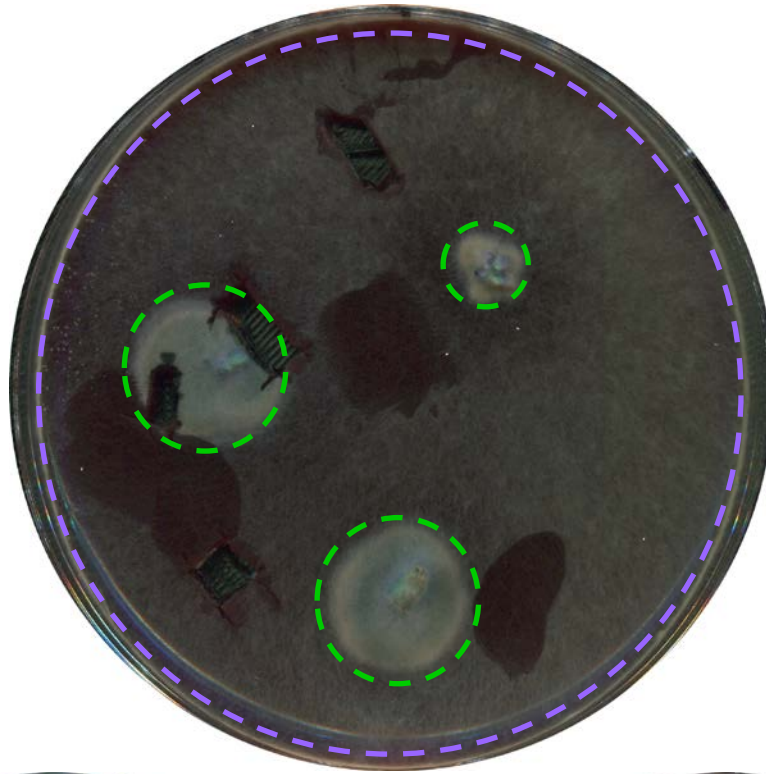**B**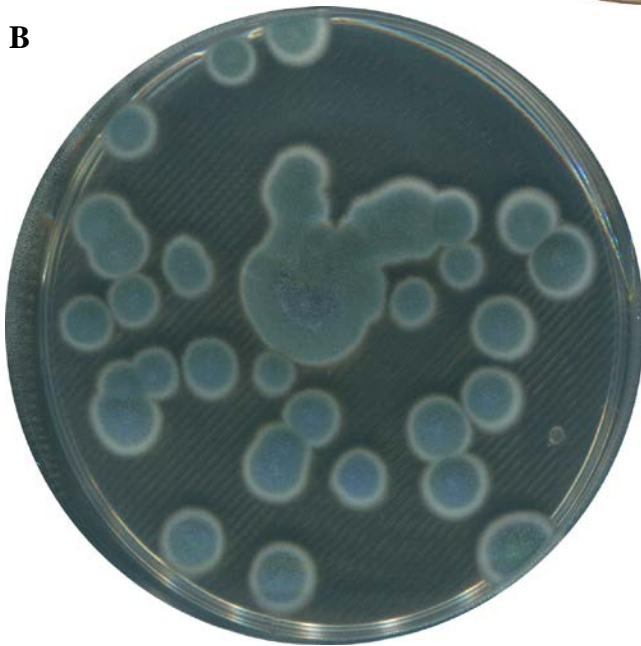**C**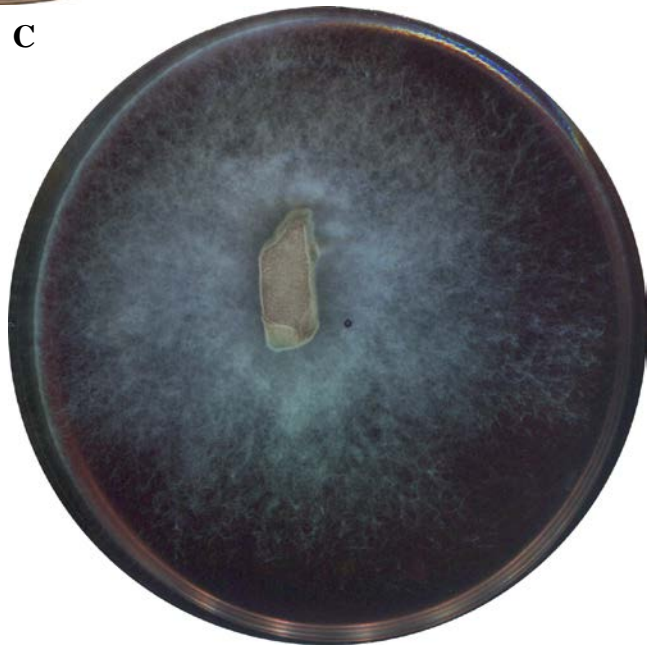

**Figure S4.** (A) Contaminated fungal culture coded MSX19583 with the “green” fungus indicated by the green circles and the “purple” fungus indicated by the purple circle. (B) Isolated fungal cultures of MSX19583 (green), *Aspergillus sydowii*, (C) and the contaminant (purple), *Chaetomium* sp.

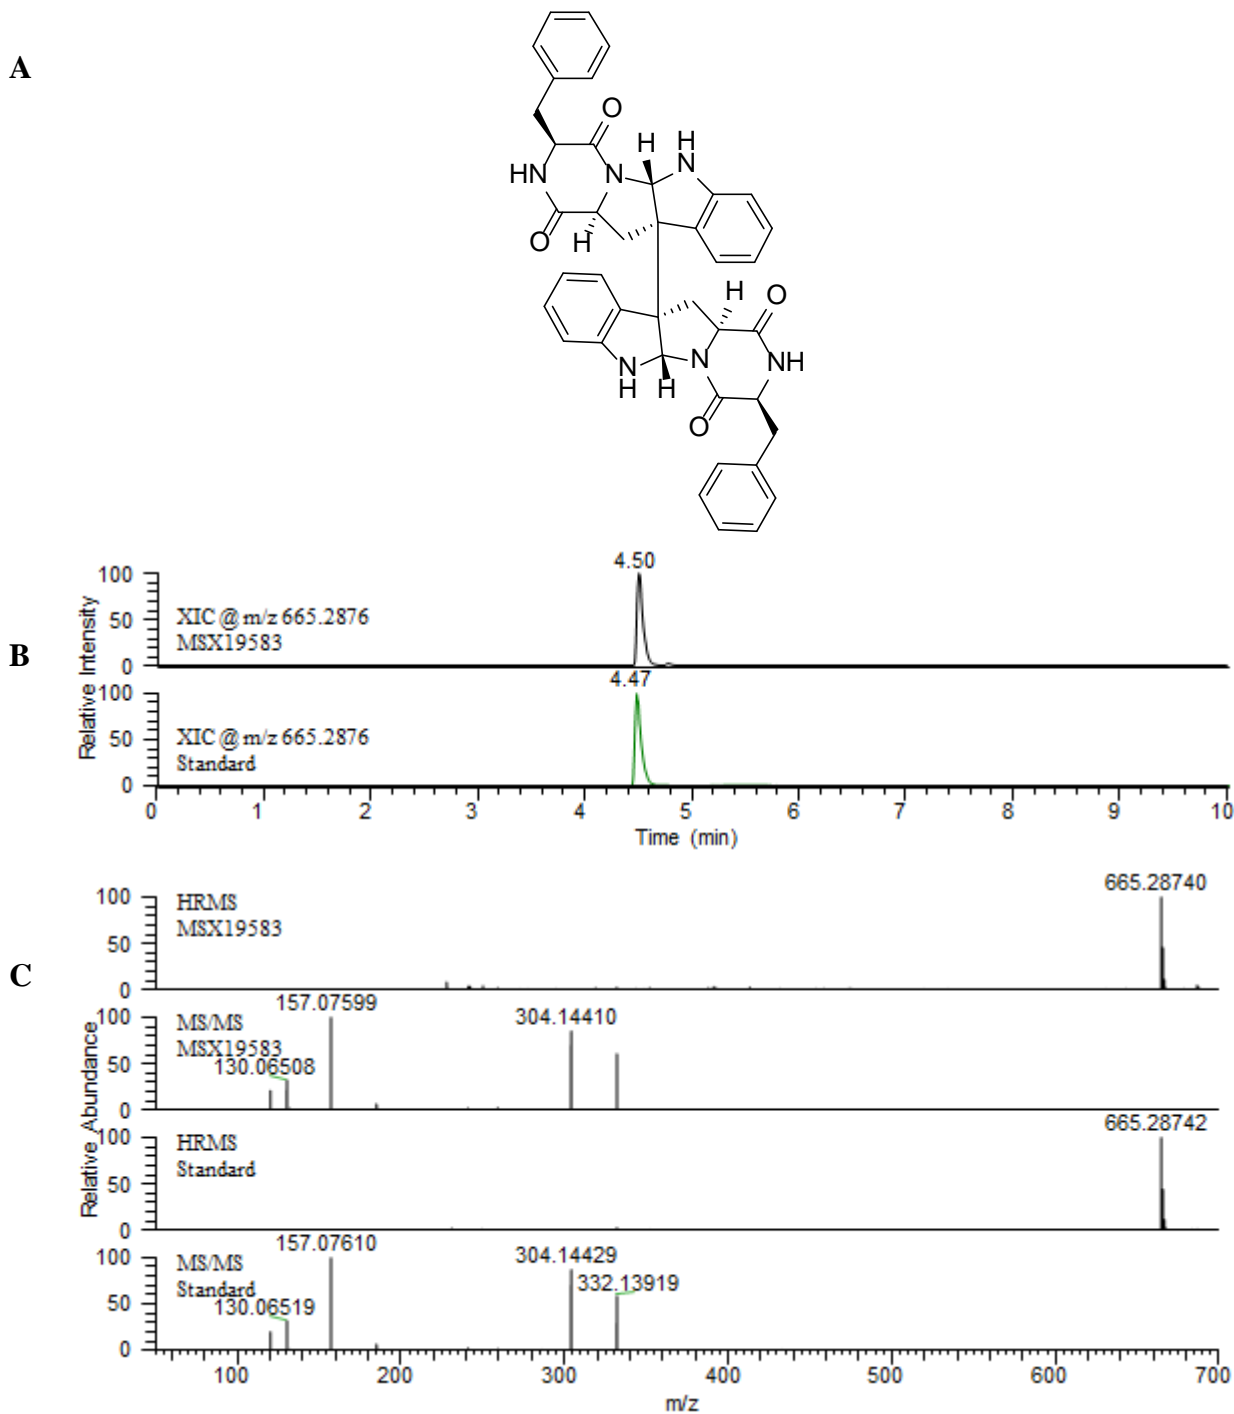

**Figure S5.** (A) Structure of a diketopiperazine dimer (**9**) detected on the green fungal culture coded MSX19583 (Figure S4A). (B) A comparison of the extracted ion chromatograms (XIC) from the fungal culture (top) and the standard (bottom) for the accurate mass of compound **9**. (C) A comparison of the HRMS and the MS/MS for the fungal culture and the standard for compound **9**.

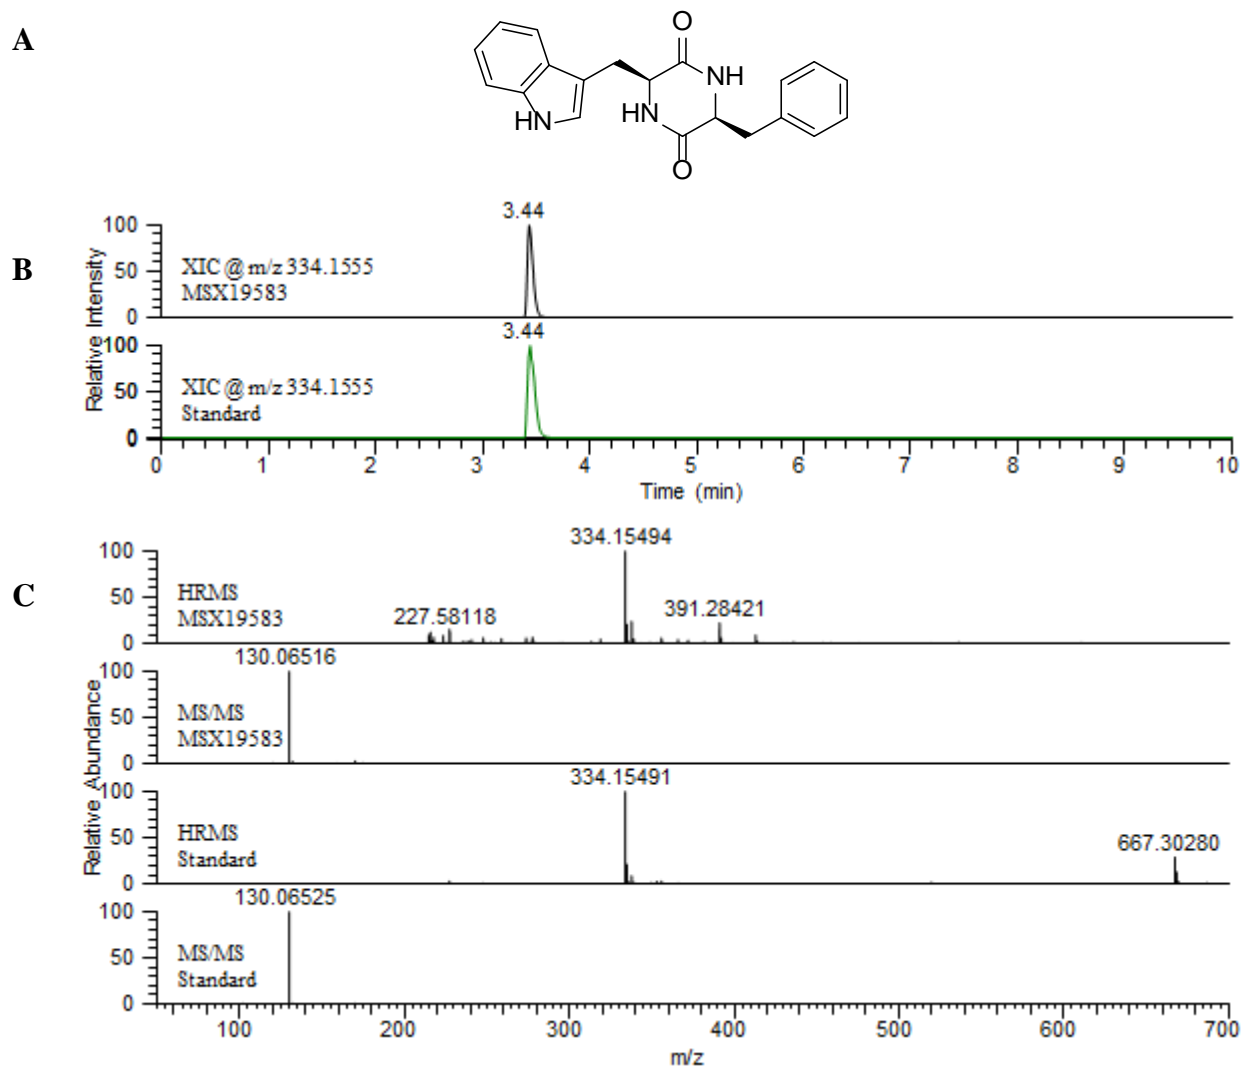

**Figure S6.** (A) Structure of cyclo-(L-phenylalanyl-L-tryptophanyl) (**10**) detected on the green fungal culture coded MSX19583 (Figure S4A). (B) A comparison of the extracted ion chromatograms (XIC) from the fungal culture (top) and the standard (bottom) for the accurate mass of compound **10**. (C) A comparison of the HRMS and the MS/MS for the fungal culture and the standard for compound **10**.

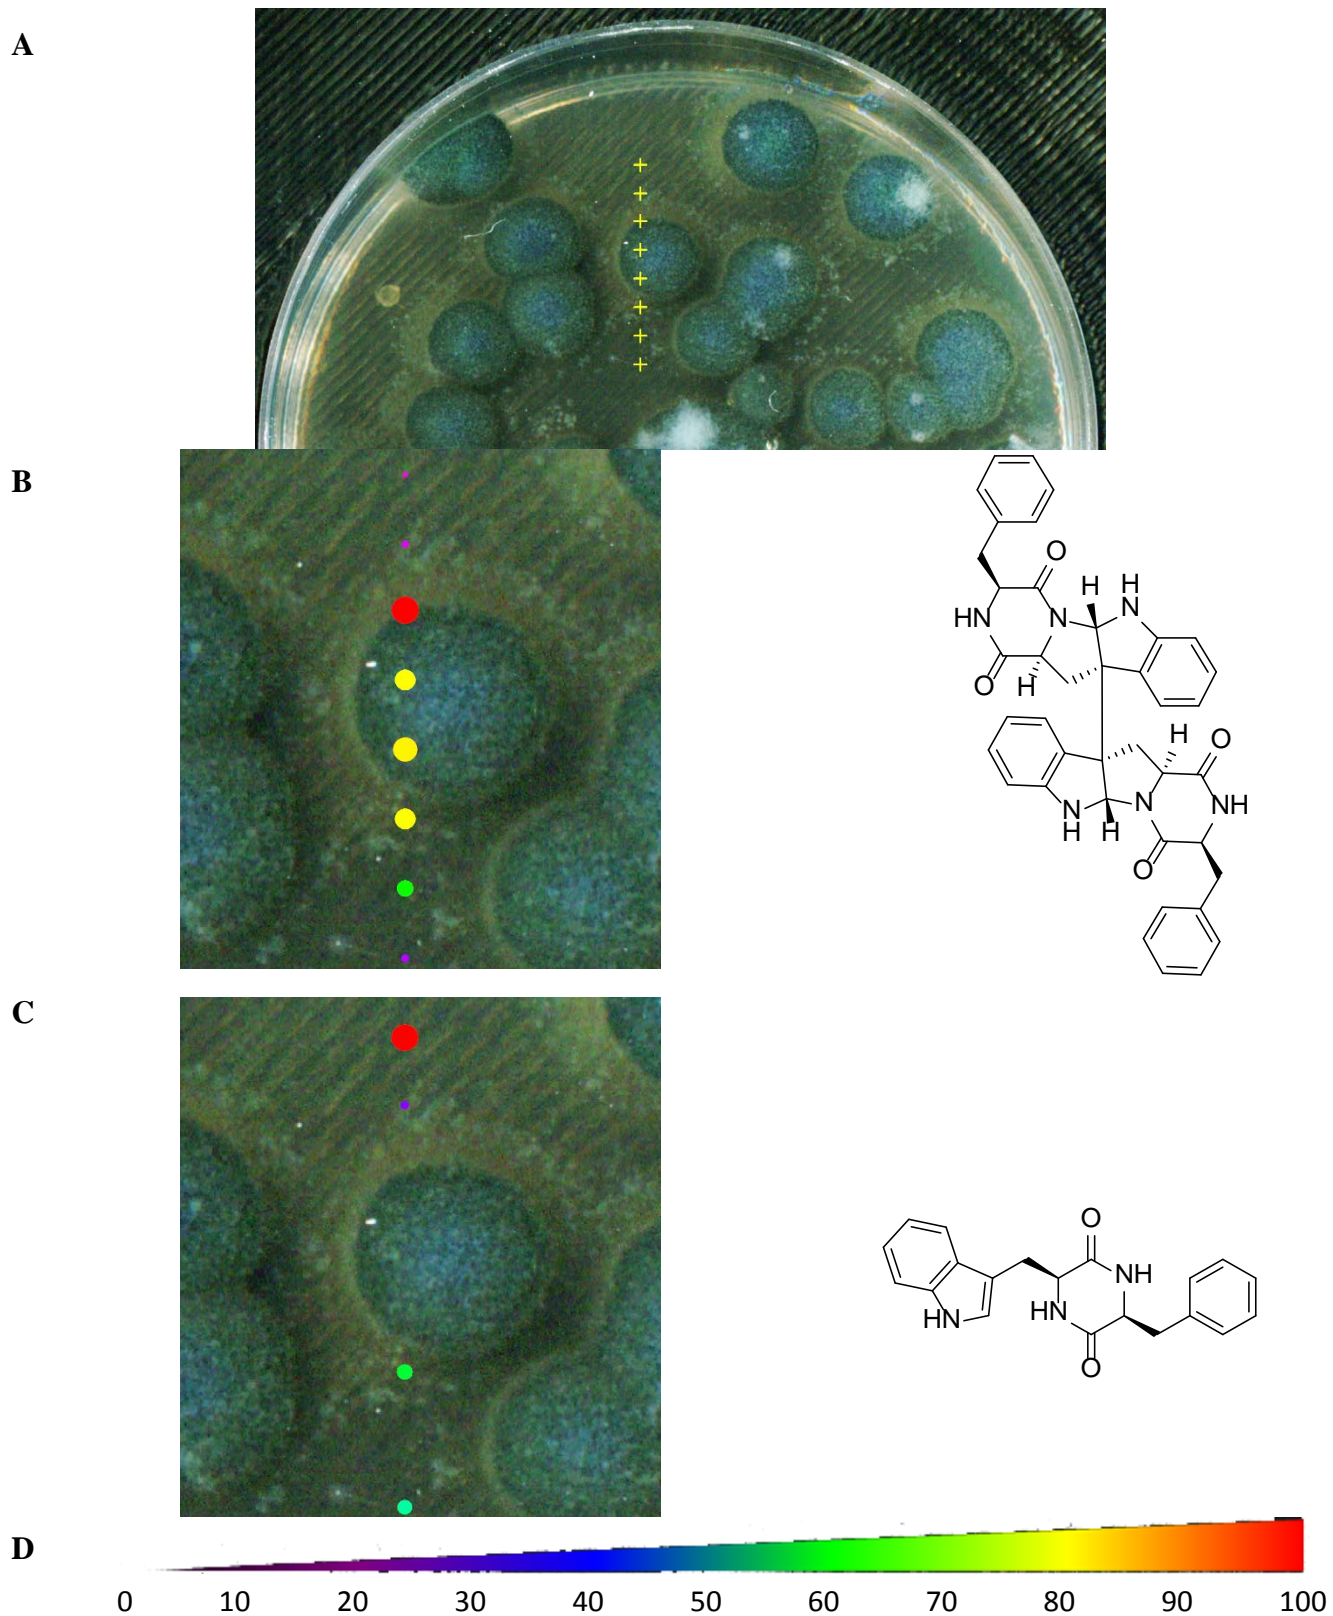

**Figure S7.** (A) Image of pure culture MSX19583 with yellow crosshairs indicating sampled areas. (B) Heat map of compound **9** as sampling from the contaminant to the culture. (C) Heat map of compound **8** as sampling from the contaminant to the culture. (D) The color scale and diameter of spot indicate the relative amount of signal detected for the given analytes.



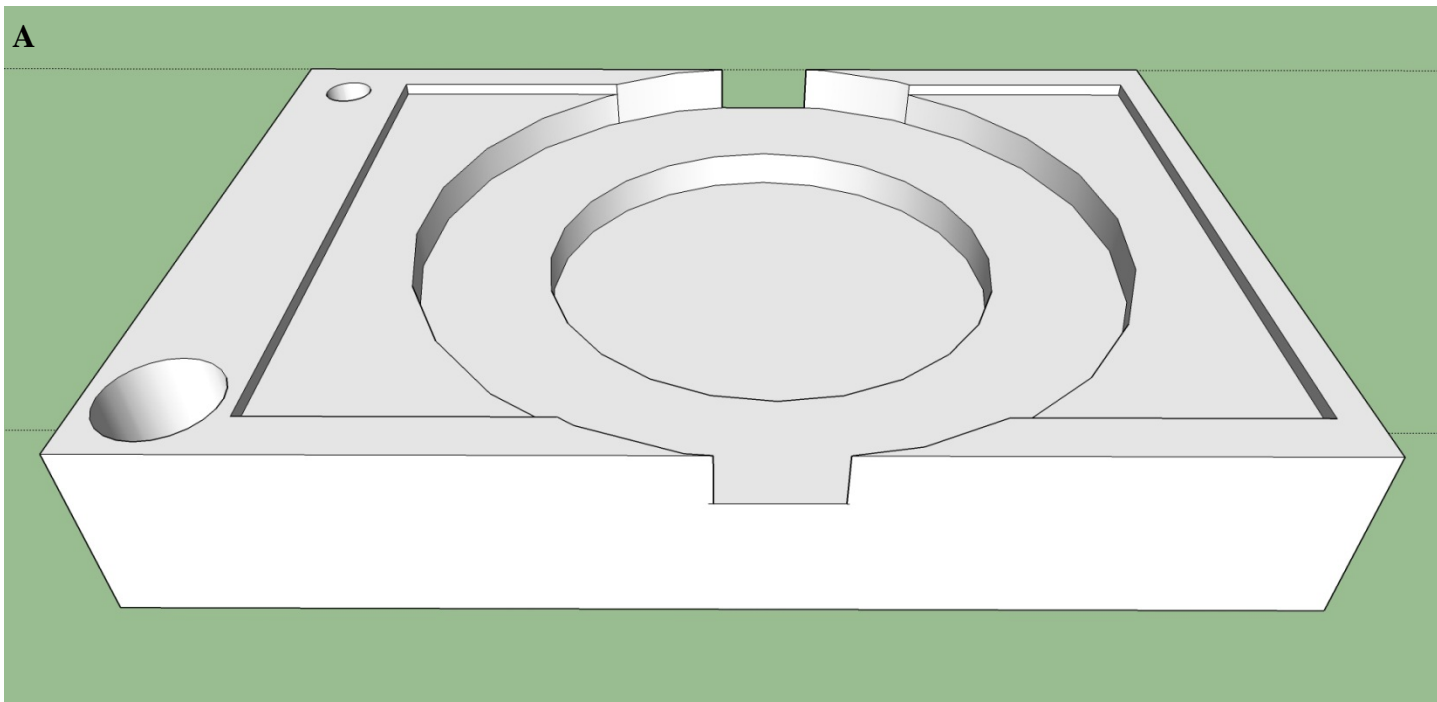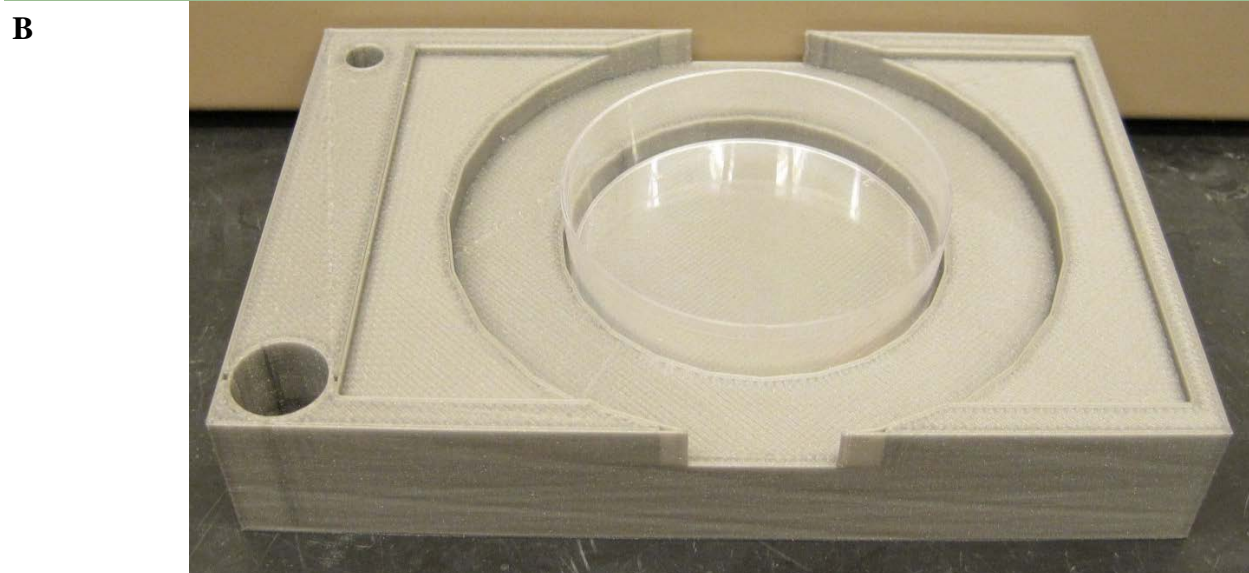

**Figure S8.** 3D model created using SketchUp Make of the custom tray designed to hold a Petri dish and a solvent vial (**A**). Photograph of the printed tray using the F306 3D printer (**B**).

**Table S1.** Fungal metabolites that were identified by the droplet-LMJ-SSP, recording the retention time (Rt), UV data, HRMS, and MS/MS.

| #                                                                                 | Chemical Structure and Chemical formula                                                                                                  | Rt (min)                                                                                                                           | UV (nm)                  | Positive Ionization Mode |                                                                                                                                  |
|-----------------------------------------------------------------------------------|------------------------------------------------------------------------------------------------------------------------------------------|------------------------------------------------------------------------------------------------------------------------------------|--------------------------|--------------------------|----------------------------------------------------------------------------------------------------------------------------------|
|                                                                                   |                                                                                                                                          |                                                                                                                                    |                          | [M+H] <sup>+</sup>       | MS/MS                                                                                                                            |
|  |                                                                                                                                          | <b>G100<sup>13</sup></b><br><i>Clohesyomyces aquaticus</i><br>GenBank # KM589854<br>Freshwater fungus isolated from submerged wood |                          |                          |                                                                                                                                  |
| 1                                                                                 | <br><b>Phomopsinone A</b><br><chem>C12H16O4</chem>      | 4.36                                                                                                                               | 205<br>221<br>284        | 225.1120<br>(-0.6)       | 153.0546<br>111.0440, 135.0440<br>125.0597, 97.0646<br>79.0178, 121.0283                                                         |
| 2                                                                                 | <br><b>Pyrenocine M</b><br><chem>C12H18O4</chem>        | 3.62                                                                                                                               | 208<br>221<br>283        | 227.1278<br>(+0.1)       | 209.1171<br>167.0703, 131.0854<br>93.0699, 79.0541<br>197.1172, 139.0390                                                         |
| 3                                                                                 | <br><b>Secalonic acid A</b><br><chem>C32H30O14</chem> | 5.50                                                                                                                               | 193<br>222<br>264<br>337 | 639.1713<br>(+0.7)       | 183.0651, 561.1390<br>193.0495, 501.1177<br>579.1493, 483.1071<br>589.1340, 377.0652<br>169.0495, 455.0979<br>543.1285, 151.0390 |

| 4                                                                                 | 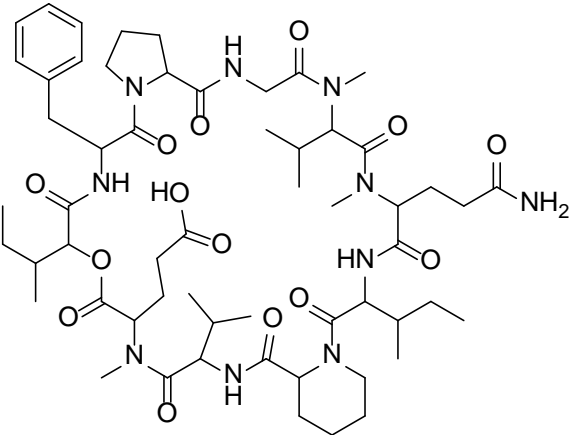 <p style="text-align: center;"><b>Sch 217048</b><br/>C<sub>57</sub>H<sub>88</sub>N<sub>10</sub>O<sub>14</sub></p> | 4.98                                                                                                                                           | 192<br>216 | 1137.6570<br>(+1.4)      | 86.0963, 268.1651<br>256.1653, 228.1704<br>350.2066, 39.1958<br>377.2065, 405.2017<br>211.1438, 286.1754<br>484.2432, 155.0813<br>654.3506, 559.2763   |
|-----------------------------------------------------------------------------------|-----------------------------------------------------------------------------------------------------------------------------------------------------------------------------------------------------|------------------------------------------------------------------------------------------------------------------------------------------------|------------|--------------------------|--------------------------------------------------------------------------------------------------------------------------------------------------------|
|  |                                                                                                                                                                                                     | <p><b>G87<sup>31</sup></b><br/><i>Halenospora aff. varia</i><br/>GenBank # KJ803850<br/>Fungus isolated from submerged wood in fresh water</p> |            |                          |                                                                                                                                                        |
| #                                                                                 | Chemical Structure and Chemical formula                                                                                                                                                             | Rt (min)                                                                                                                                       | UV (nm)    | Positive Ionization Mode |                                                                                                                                                        |
| 5                                                                                 |  <p style="text-align: center;"><b>Greensporone A</b><br/>C<sub>19</sub>H<sub>21</sub>O<sub>6</sub>Cl</p>        | 4.03                                                                                                                                           | 222<br>294 | 381.1099<br>(0.0)        | 265.0259, 237.0310<br>241.0261, 123.0804<br>145.0648, 215.0102<br>253.0260, 263.0466<br>209.0364, 345.0883<br>363.0987, 281.0574<br>303.0415, 289.0260 |

| 6                                                                                   | 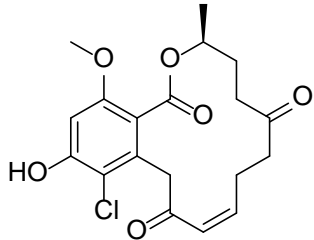 <p><b>Greensporone B</b><br/>C<sub>19</sub>H<sub>21</sub>O<sub>6</sub>Cl</p>             | 4.20                                                                                                                                                                     | 238<br>291 | 381.1099<br>(0.0)        | 265.0262, 237.0312<br>241.0261, 253.0261<br>145.0648, 209.0362<br>123.0805, 215.0104<br>289.0265, 345.0886<br>363.0995, 303.0793                                            |
|-------------------------------------------------------------------------------------|---------------------------------------------------------------------------------------------------------------------------------------------------------------------------|--------------------------------------------------------------------------------------------------------------------------------------------------------------------------|------------|--------------------------|-----------------------------------------------------------------------------------------------------------------------------------------------------------------------------|
| 7                                                                                   |  <p><b>8,9-Dihydrogreensporone A</b><br/>C<sub>19</sub>H<sub>23</sub>O<sub>6</sub>Cl</p> | 4.45                                                                                                                                                                     | 218<br>291 | 383.1256<br>(0.0)        | 265.0619, 263.0472<br>215.0104, 125.0961<br>83.0491, 171.0209<br>224.9948, 243.0054<br>253.0261, 237.0673<br>227.0624, 293.0577<br>305.0581, 329.0937<br>347.1045, 365.1153 |
| 8                                                                                   |  <p><b>Greensporone F</b><br/>C<sub>19</sub>H<sub>23</sub>O<sub>6</sub>Cl</p>            | 4.70                                                                                                                                                                     | 217<br>290 | 383.1255<br>(-0.2)       | 241.0252, 107.0857<br>79.0543, 97.1014<br>125.0958, 211.0159<br>224.9953, 253.0249<br>265.0253, 293.0578<br>309.0531, 347.1031<br>365.1136, 329.0913                        |
|  |                                                                                                                                                                           | <p><b>MSX19583<sup>32</sup></b><br/><i>Aspergillus sydowii</i><br/>GenBank # ITS: KP702233; RPB1: KP702234; RPB2:<br/>KP702231, KP702232<br/>Fungus from MSX library</p> |            |                          |                                                                                                                                                                             |
| #                                                                                   | Chemical Structure and Chemical formula                                                                                                                                   | Rt<br>(min)                                                                                                                                                              | UV (nm)    | Positive Ionization Mode |                                                                                                                                                                             |
|                                                                                     |                                                                                                                                                                           |                                                                                                                                                                          |            | [M+H] <sup>+</sup>       | MS/MS                                                                                                                                                                       |

|    |                                                                                                                                                                                                    |      |                                 |                                                           |                                                                                                            |
|----|----------------------------------------------------------------------------------------------------------------------------------------------------------------------------------------------------|------|---------------------------------|-----------------------------------------------------------|------------------------------------------------------------------------------------------------------------|
| 9  | 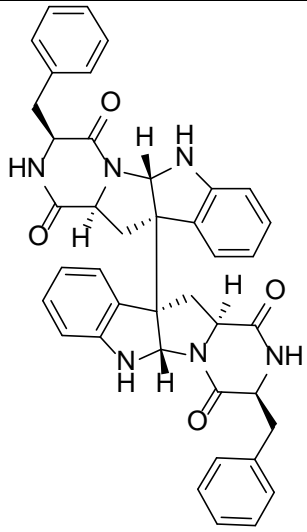 <p><b>Diketopiperazine dimer</b><br/>C<sub>40</sub>H<sub>36</sub>N<sub>6</sub>O<sub>4</sub></p>                   | 4.48 | 192<br>208<br>300               | 665.2877<br>(+0.9)                                        | 157.0763, 304.1448<br>332.1401, 130.0652<br>120.0811, 185.0715<br>241.0845, 433.1996<br>259.1226, 286.1351 |
| 10 |  <p><b>Cyclo-(L-phenylalaninyl-L-tryptophanyl)</b><br/>C<sub>20</sub>H<sub>19</sub>N<sub>3</sub>O<sub>2</sub></p> | 3.46 | 191<br>218<br>279<br>289<br>364 | 334.1549<br>(-0.3)                                        | 130.0652, 170.0596<br>120.0810, 159.0914<br>175.0863, 234.1275<br>205.0968, 289.1338<br>261.1387, 91.0543  |
| 11 |  <p><b>S-sydonic acid</b><br/>C<sub>15</sub>H<sub>22</sub>O<sub>4</sub></p>                                      | 5.07 | 212<br>240<br>300               | [M+H-H <sub>2</sub> O] <sup>+</sup><br>249.1486<br>(+0.3) | 165.0549, 151.0386<br>69.0699, 107.0490<br>121.0646, 179.0704<br>193.0865, 231.1387<br>85.1010, 213.1267   |
| 12 |                                                                                                                 | 4.96 | 198<br>221<br>278               | [M+H-H <sub>2</sub> O] <sup>+</sup><br>235.1694<br>(+0.6) | 151.0755, 137.0601<br>121.0647, 161.0956<br>217.1589, 107.0490<br>175.1121, 147.0808<br>205.1593, 69.0700  |

|    |                                                                                                                                                     | <b>S-sydonol</b><br>$C_{15}H_{24}O_3$                                             |                   |                                                                                                                                                                                                                                   |                                                                                                            |  |  |  |  |
|----|-----------------------------------------------------------------------------------------------------------------------------------------------------|-----------------------------------------------------------------------------------|-------------------|-----------------------------------------------------------------------------------------------------------------------------------------------------------------------------------------------------------------------------------|------------------------------------------------------------------------------------------------------------|--|--|--|--|
|    |                                                                                                                                                     |  |                   | <p style="text-align: center;"><b>G77<sup>33</sup></b><br/> <i>Aspergillus izukae</i><br/>           GenBank # AB859956<br/> <b>Endophytic fungus isolated from surface sterilized leaves of</b><br/> <i>Silybum marianum</i></p> |                                                                                                            |  |  |  |  |
| #  | Chemical Structure and Chemical formula                                                                                                             | Rt (min)                                                                          | UV (nm)           | Positive Ionization Mode                                                                                                                                                                                                          |                                                                                                            |  |  |  |  |
|    |                                                                                                                                                     |                                                                                   |                   | [M+H] <sup>+</sup>                                                                                                                                                                                                                | MS/MS                                                                                                      |  |  |  |  |
| 13 | <br><b>Bisdechlorogedin</b><br>$C_{17}H_{14}O_7$                   | 4.06                                                                              | 218<br>284        | 331.0810<br>(-0.7)                                                                                                                                                                                                                | 272.0681, 299.0535<br>275.0446, 284.0308<br>287.0917, 255.0649<br>244.0726, 228.0408                       |  |  |  |  |
| 14 | <br><b>Antibiotic SS 19508D; SS 19508D</b><br>$C_{17}H_{13}O_7Cl$ | 4.52                                                                              | 214<br>284        | 365.0423<br>(+0.1)                                                                                                                                                                                                                | 306.0286, 333.0149<br>291.0060, 317.9919<br>321.0529, 286.0828<br>263.0098, 277.0258<br>286.0844, 271.0587 |  |  |  |  |
| 15 | <br><b>Geodin</b><br>$C_{17}H_{12}O_7Cl_2$                       | 5.15                                                                              | 220<br>284<br>352 | 399.0034<br>(+0.3)                                                                                                                                                                                                                | 339.9913, 324.9667<br>366.9775, 351.9529<br>296.9696, 310.9878<br>268.9758, 295.9627<br>355.0136, 320.0448 |  |  |  |  |

| 16                                                                                | 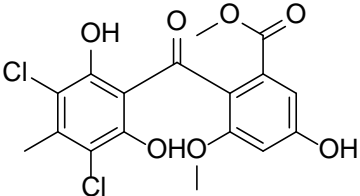 <p><b>Dihydrogeodin</b><br/>C<sub>17</sub>H<sub>14</sub>O<sub>7</sub>Cl<sub>2</sub></p>                                                                          | 5.26                                                                                                                                                              | 220<br>281<br>347 | 401.0190<br>(+0.2)       | 209.0444, 237.0391<br>277.0262, 341.9870<br>219.0286, 151.0389<br>326.9632, 368.9863<br>179.0337, 86.9995<br>305.0213, 297.9612 |
|-----------------------------------------------------------------------------------|---------------------------------------------------------------------------------------------------------------------------------------------------------------------------------------------------------------------------------------------------|-------------------------------------------------------------------------------------------------------------------------------------------------------------------|-------------------|--------------------------|---------------------------------------------------------------------------------------------------------------------------------|
|  |                                                                                                                                                                                                                                                   | <p><b>G324</b><br/><i>Penicillium</i> sp.<br/>GenBank # KM215636<br/>Endophytic fungus isolated from surface sterilized leaves of<br/><i>Silybum marianum</i></p> |                   |                          |                                                                                                                                 |
| #                                                                                 | Chemical Structure and Chemical formula                                                                                                                                                                                                           | Rt<br>(min)                                                                                                                                                       | UV (nm)           | Positive Ionization Mode |                                                                                                                                 |
|                                                                                   |                                                                                                                                                                                                                                                   |                                                                                                                                                                   |                   | [M+H] <sup>+</sup>       | MS/MS                                                                                                                           |
| 17                                                                                |  <p><b>10, 20-dehydro[12,13-dehydropropyl-2-(1,1-dimethylallyl) tryptophyl] diketopiperazine</b><br/>C<sub>21</sub>H<sub>21</sub>N<sub>3</sub>O<sub>2</sub></p> | 3.56                                                                                                                                                              | 222<br>270        | 348.1708<br>(+0.4)       | 196.1120, 292.1077<br>182.0964, 264.1128<br>237.1020, 306.1232<br>331.1448, 280.1080<br>169.0759, 130.0652                      |
| 18                                                                                |                                                                                                                                                                | 4.09                                                                                                                                                              | 217<br>288<br>437 | 350.1864<br>(+0.3)       | 130.0651, 198.1276<br>153.0657, 69.0700<br>238.1338, 294.1234<br>282.1232, 144.0807<br>221.1075, 183.1042<br>170.0598, 151.0500 |

|                                                                                     | <p><b>12,13-Dehydroprolyl-2-(1,1-dimethylallyltryptophyl)diketopiperazine</b><br/> <math>C_{21}H_{23}N_3O_2</math></p>                                |                                                                                                                                                                             |                   |                          |                                                                                                                                                       |
|-------------------------------------------------------------------------------------|-------------------------------------------------------------------------------------------------------------------------------------------------------|-----------------------------------------------------------------------------------------------------------------------------------------------------------------------------|-------------------|--------------------------|-------------------------------------------------------------------------------------------------------------------------------------------------------|
|    |                                                                                                                                                       | <p><b>G142<sup>34</sup></b><br/> <i>Fusicolla</i> sp.<br/> <b>GenBank # AB858346</b><br/> <b>Fungus isolated from submerged wood in fresh water</b></p>                     |                   |                          |                                                                                                                                                       |
| #                                                                                   | Chemical Structure and Chemical formula                                                                                                               | Rt (min)                                                                                                                                                                    | UV (nm)           | Positive Ionization Mode |                                                                                                                                                       |
|                                                                                     |                                                                                                                                                       |                                                                                                                                                                             |                   | [M+H] <sup>+</sup>       | MS/MS                                                                                                                                                 |
| 19                                                                                  |  <p><b>Acuminatum B</b><br/> <math>C_{45}H_{73}N_7O_{11}</math></p> | 6.57                                                                                                                                                                        | 193<br>224<br>277 | 888.5443<br>(+0.2)       | 306.2430, 324.2522<br>377.2790, 101.0708<br>136.0760, 86.0964<br>395.2893, 349.2832<br>143.0818, 296.2573<br>448.3170, 466.3271<br>576.3774, 778.0210 |
|  |                                                                                                                                                       | <p><b>G121</b><br/> <i>Cylindrocarpon</i> sp.<br/> <b>GenBank # KM816764</b><br/> <b>Endophytic fungus isolated from surface sterilized roots of <i>Yerba mansa</i></b></p> |                   |                          |                                                                                                                                                       |



| #                                                                                 | Chemical Structure and Chemical formula                                                                                                                                           | Rt (min)                                                                                                                                                  | UV (nm)    | Positive Ionization Mode |                                                                                                                                |
|-----------------------------------------------------------------------------------|-----------------------------------------------------------------------------------------------------------------------------------------------------------------------------------|-----------------------------------------------------------------------------------------------------------------------------------------------------------|------------|--------------------------|--------------------------------------------------------------------------------------------------------------------------------|
|                                                                                   |                                                                                                                                                                                   |                                                                                                                                                           |            | [M+H] <sup>+</sup>       | MS/MS                                                                                                                          |
| 20                                                                                | 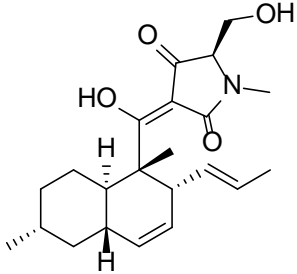 <p><b>Equisetin</b><br/>C<sub>22</sub>H<sub>31</sub>NO<sub>4</sub></p>                          | 7.08                                                                                                                                                      | 224<br>295 | 374.2328<br>(+0.6)       | 175.1475, 71.0700<br>119.0853, 188.0562<br>105.0701, 83.0855<br>133.1012, 147.1166<br>170.0806, 200.0913<br>302.1758, 356.2210 |
|  |                                                                                                                                                                                   | <p><b>G168</b><br/><i>Fusarium</i> sp.<br/>GenBank # KP897159<br/>Endophytic fungus isolated from surface sterilized stems of<br/><i>Hedera helix</i></p> |            |                          |                                                                                                                                |
| #                                                                                 | Chemical Structure and Chemical formula                                                                                                                                           | Rt (min)                                                                                                                                                  | UV (nm)    | Positive Ionization Mode |                                                                                                                                |
|                                                                                   |                                                                                                                                                                                   |                                                                                                                                                           |            | [M+H] <sup>+</sup>       | MS/MS                                                                                                                          |
| 21                                                                                |  <p><b>Enniatin D (Analogue)</b><br/>C<sub>34</sub>H<sub>59</sub>N<sub>3</sub>O<sub>9</sub></p> | 7.87                                                                                                                                                      | 210        | 654.4301<br>(-3.5)       | 196.1325, 214.1431<br>86.0962, 100.1117<br>186.1486, 314.1964<br>210.1487, 228.1586<br>328.2092, 414.2442                      |

| 22                                                                                 | 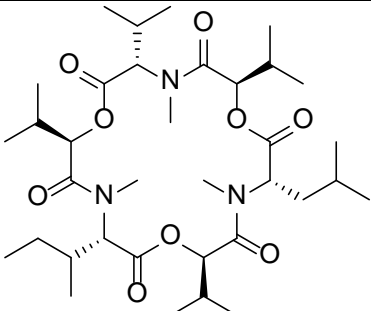 <p><b>Enniatin E (Analogue)</b><br/>C<sub>35</sub>H<sub>61</sub>N<sub>3</sub>O<sub>9</sub></p> | 8.24                                                                                                                            | 210     | 668.4458<br>(-3.4)       | 210.1489, 100.1117<br>228.1586, 196.1325<br>86.0962, 328.2093<br>200.1639, 217.1433<br>186.1487, 314.1956<br>441.2947, 598.7202  |
|------------------------------------------------------------------------------------|---------------------------------------------------------------------------------------------------------------------------------------------------------------------------------|---------------------------------------------------------------------------------------------------------------------------------|---------|--------------------------|----------------------------------------------------------------------------------------------------------------------------------|
| 23                                                                                 |  <p><b>Aurofusarin</b><br/>C<sub>30</sub>H<sub>18</sub>O<sub>12</sub></p>                      | 5.05                                                                                                                            | 223     | 571.0860<br>(-2.6)       | 485.0493, 556.0576<br>541.0351, 528.0696<br>496.0432, 456.0803<br>441.0589, 571.0832<br>513.0442, 511.0640<br>231.0291, 297.0352 |
|  |                                                                                                                                                                                 | <p><b>MSX59553<sup>35</sup></b><br/><b>Hypocreales sp.</b><br/><b>GenBank # JQ749725</b><br/><b>Fungus from MSX library</b></p> |         |                          |                                                                                                                                  |
| #                                                                                  | Chemical Structure and Chemical formula                                                                                                                                         | Rt<br>(min)                                                                                                                     | UV (nm) | Positive Ionization Mode |                                                                                                                                  |
|                                                                                    |                                                                                                                                                                                 |                                                                                                                                 |         | [M+H] <sup>+</sup>       | MS/MS                                                                                                                            |

| 24                                                                                  | 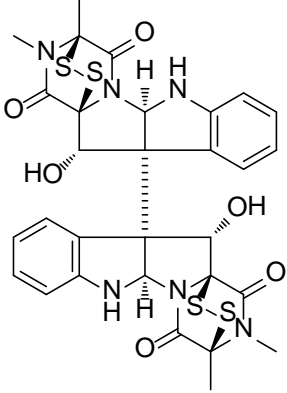 <p><b>Verticillin A</b><br/>C<sub>30</sub>H<sub>28</sub>N<sub>6</sub>O<sub>6</sub>S<sub>4</sub></p> | 5.63                                                                                                                            | 212<br>303 | 697.1026<br>(0.0)        | 169.0603, 383.1494<br>232.0990, 615.1462<br>284.1017, 551.2020<br>401.1592, 266.0911<br>465.1022, 348.0461 |
|-------------------------------------------------------------------------------------|---------------------------------------------------------------------------------------------------------------------------------------------------------------------------------------|---------------------------------------------------------------------------------------------------------------------------------|------------|--------------------------|------------------------------------------------------------------------------------------------------------|
| 25                                                                                  |  <p><b>Sch 52900</b><br/>C<sub>31</sub>H<sub>30</sub>N<sub>6</sub>O<sub>7</sub>S<sub>4</sub></p>     | 5.44                                                                                                                            | 210<br>300 | 727.11334<br>(0.3)       | 169.0671, 199.0712<br>232.0991, 284.1025<br>268.1075, 296.1021<br>314.1130, 383.1498<br>413.1608, 266.0918 |
|  |                                                                                                                                                                                       | <p><b>MSX70741<sup>36</sup></b><br/><b>Hypocreales sp.</b><br/><b>GenBank # JN377382</b><br/><b>Fungus from MSX library</b></p> |            |                          |                                                                                                            |
| #                                                                                   | Chemical Structure and Chemical formula                                                                                                                                               | Rt                                                                                                                              | UV (nm)    | Positive Ionization Mode |                                                                                                            |

|                                                                                    |                                                                                                                                                                               | (min)                                                                                                                                                                            |         | [M+H] <sup>+</sup>       | MS/MS                                                                                                                              |
|------------------------------------------------------------------------------------|-------------------------------------------------------------------------------------------------------------------------------------------------------------------------------|----------------------------------------------------------------------------------------------------------------------------------------------------------------------------------|---------|--------------------------|------------------------------------------------------------------------------------------------------------------------------------|
| 26                                                                                 | 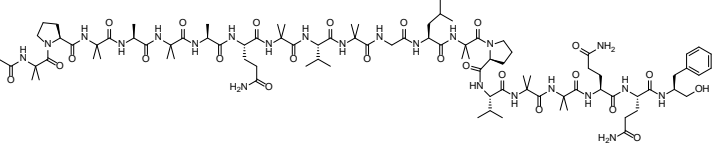 <p><b>Alamethicin F50</b><br/>C<sub>92</sub>H<sub>151</sub>N<sub>23</sub>O<sub>24</sub></p> | 6.38                                                                                                                                                                             | 217     | 1963.13428<br>(-1.6)     | 931.5340, 750.4118<br>849.4814, 466.2643<br>537.3010, 1189.6916<br>991.5539, 623.3485<br>381.2119, 744.4483                        |
|   |                                                                                                                                                                               | <p><b>MSX57715<sup>36</sup></b><br/><b>Hypocreales sp.</b><br/><b>GenBank # JN377381</b><br/><b>Fungus from MSX library</b></p>                                                  |         |                          |                                                                                                                                    |
| #                                                                                  | Chemical Structure and Chemical formula                                                                                                                                       | Rt (min)                                                                                                                                                                         | UV (nm) | Positive Ionization Mode |                                                                                                                                    |
|                                                                                    |                                                                                                                                                                               |                                                                                                                                                                                  |         | [M+H] <sup>+</sup>       | MS/MS                                                                                                                              |
| 27                                                                                 |  <p><b>Trichokonin VI</b><br/>C<sub>90</sub>H<sub>149</sub>N<sub>23</sub>O<sub>24</sub></p>  | 6.09                                                                                                                                                                             | 222     | 1937.12146<br>(-0.2)     | 908.5174, 724.3960<br>823.4647, 440.2488<br>511.2867, 774.4476<br>1163.6768, 335.1964<br>639.3439, 965.5388<br>1078.6225, 284.1588 |
|  |                                                                                                                                                                               | <p><b>G169</b><br/><b>Alternaria sp.</b><br/><b>GenBank # KP897160</b><br/><b>Endophytic fungus isolated from surface sterilized stems of</b><br/><b><i>Hedera helix</i></b></p> |         |                          |                                                                                                                                    |
| #                                                                                  | Chemical Structure and Chemical formula                                                                                                                                       | Rt (min)                                                                                                                                                                         | UV (nm) | Negative Ionization Mode |                                                                                                                                    |
|                                                                                    |                                                                                                                                                                               |                                                                                                                                                                                  |         | [M-H] <sup>-</sup>       | MS/MS                                                                                                                              |

|    |                                                                                                                                                                           |      |                                        |                    |                                                                                                            |
|----|---------------------------------------------------------------------------------------------------------------------------------------------------------------------------|------|----------------------------------------|--------------------|------------------------------------------------------------------------------------------------------------|
| 28 | 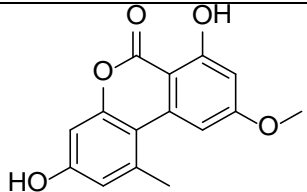 <p><b>Alternariol monomethyl ether</b><br/>C<sub>15</sub>H<sub>12</sub>O<sub>5</sub></p> | 5.03 | 222<br>255<br>287<br>298<br>332<br>341 | 271.06070          | 256.0372, 250.9916<br>210.9987, 190.9926<br>231.0053, 204.9888<br>59.0135, 154.9923                        |
| 29 |  <p><b>Alterperyleneol</b><br/>C<sub>20</sub>H<sub>14</sub>O<sub>6</sub></p>             | 3.89 | 216<br>257<br>285<br>356               | 349.0708<br>(+0.4) | 303.0653, 261.0557<br>331.0616, 285.0551<br>313.0494, 275.0694<br>287.0371, 317.0466<br>301.0532, 338.3737 |
| 30 |  <p><b>Dihydroalterperyleneol</b><br/>C<sub>20</sub>H<sub>16</sub>O<sub>6</sub></p>      | 3.81 | 218<br>258<br>283<br>356               | 351.0863<br>(0.0)  | 315.0647, 333.0765<br>305.0819, 263.0714<br>301.0494, 289.0500<br>285.0555, 298.0639<br>297.0555, 287.0700 |
